# Supplementary material
Source: PubMed Central journal article supplement (PMC2874103)
Supplement: NIHMS196193-supplement-1_si_001.pdf [file NIHMS196193-supplement-1_si_001.pdf]

## Supporting Information

### Hexylether Derivative of Pyropheophorbide-a (HPPH) on Conjugating with 3Gadolinium(III) Aminobenzyl-diethylenetriaminepentaacetic Acid Shows Potential for *In vivo* Tumor-Imaging (MR, Fluorescence) and Photodynamic Therapy

Lalit N. Goswami<sup>1</sup>, William H. White III<sup>1</sup>, Joseph A. Sperryak<sup>2</sup>, Manivannan Ethirajan<sup>1</sup>,  
Yihui Chen<sup>1</sup>, Joseph R. Missert<sup>1</sup>, Janet Morgan<sup>3</sup>, Richard Mazurchuk<sup>2</sup>  
and Ravindra K. Pandey<sup>1,\*</sup>

<sup>1</sup>PDT Center, <sup>2</sup>Cell Stress Biology and MRI Facility, <sup>3</sup>Department of Dermatology,  
Roswell Park Cancer Institute, Buffalo, NY 14263

---

#### Contents:

S1: Paper Title and Author Information

S2-5: Chemical Structures and Corresponding MR images

S6-7: Localization data for HPPH-3Gd

All of the following MR images were attained using Ward tumors in Fischer rats with a T1-weighted CHESS scan (TE/TR 10/356). Chemical Structures of the conjugates are provided along with the MR images.

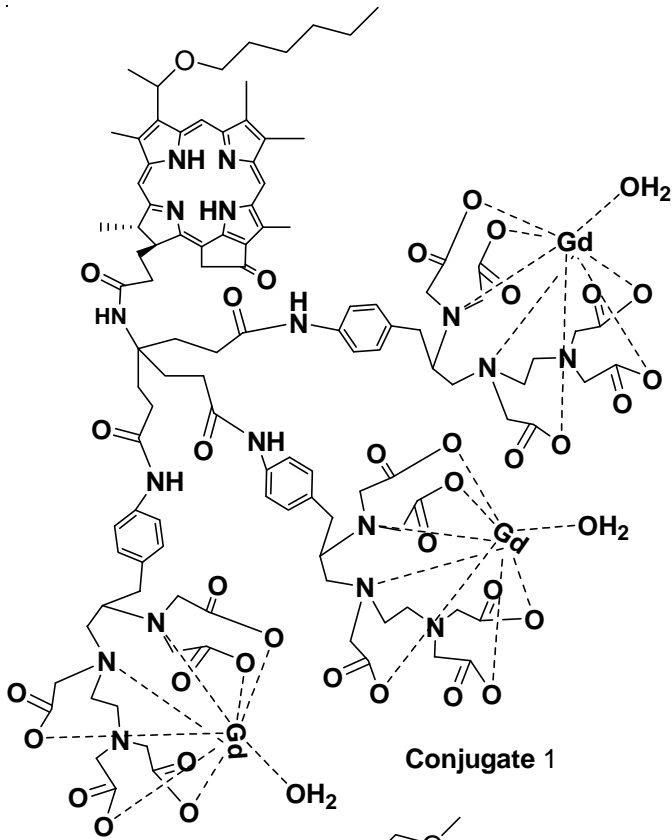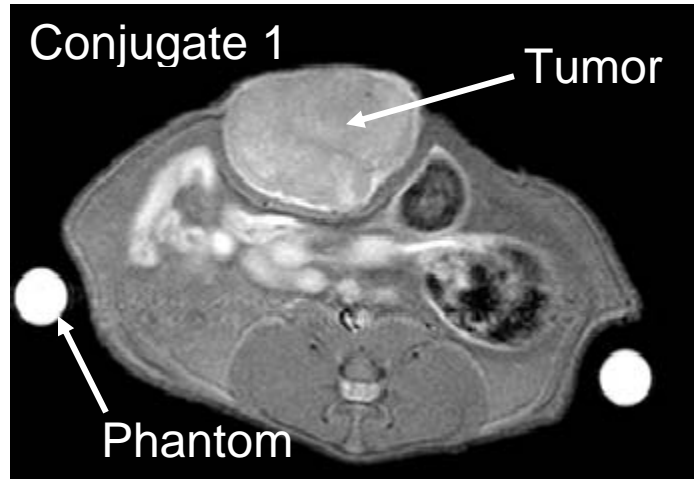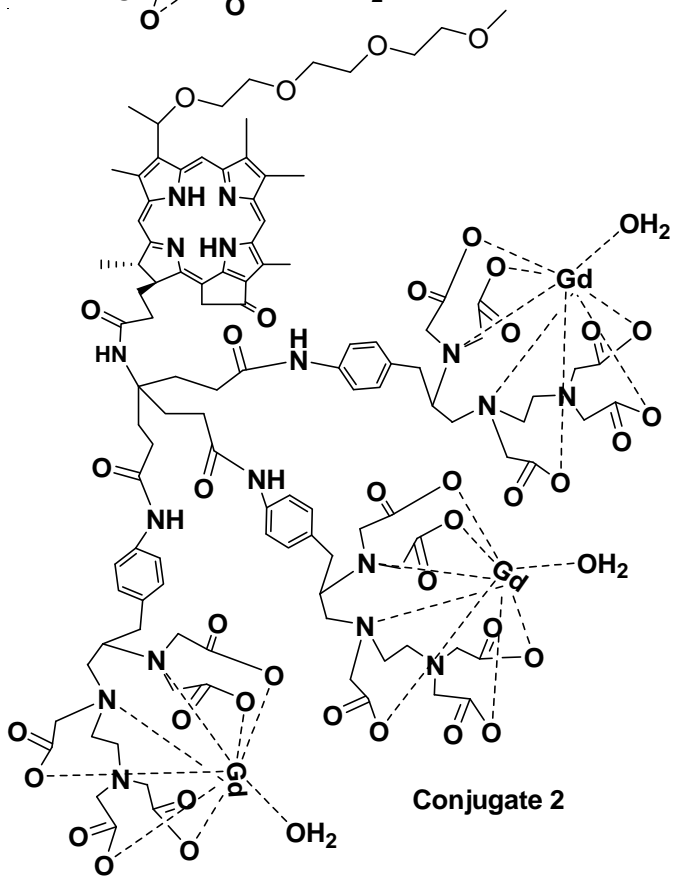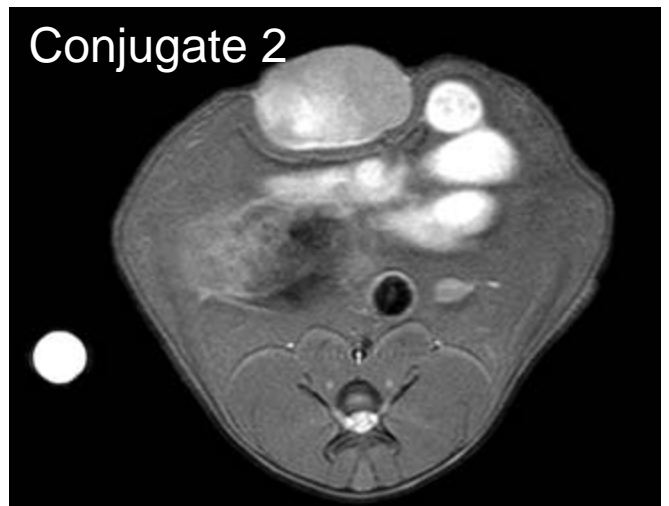

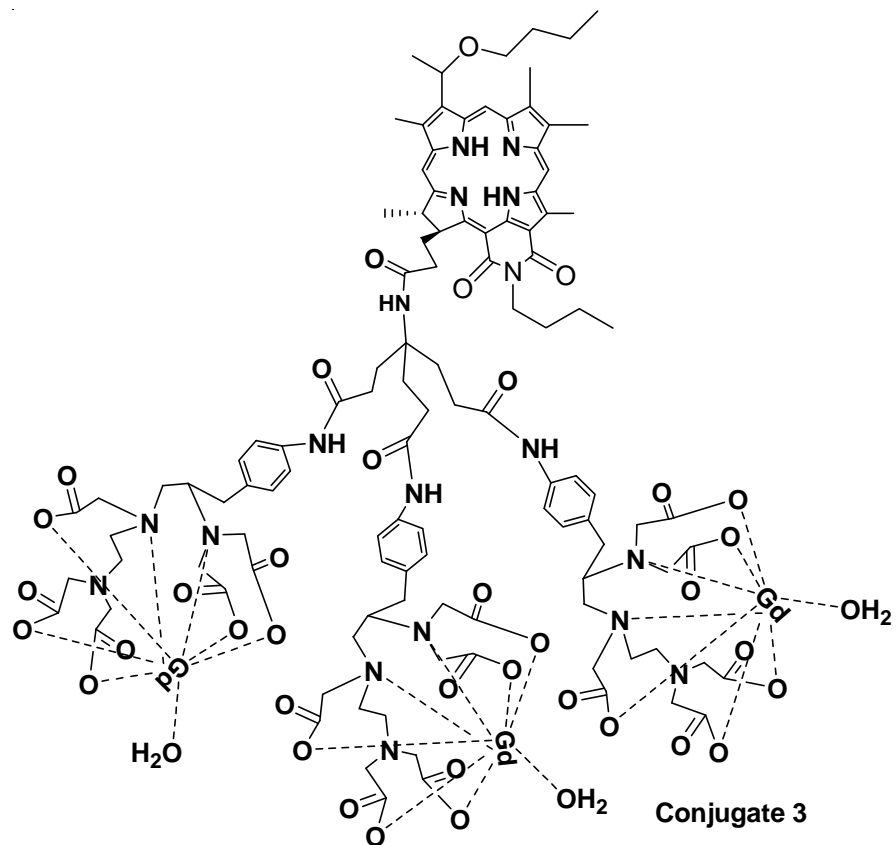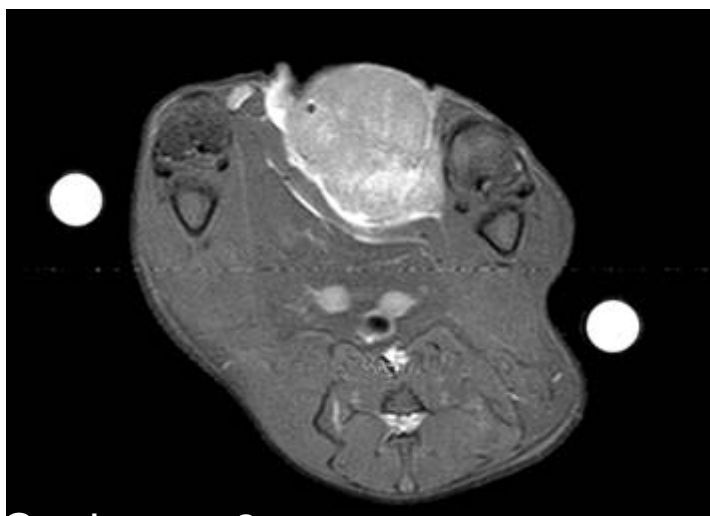

Conjugate 4

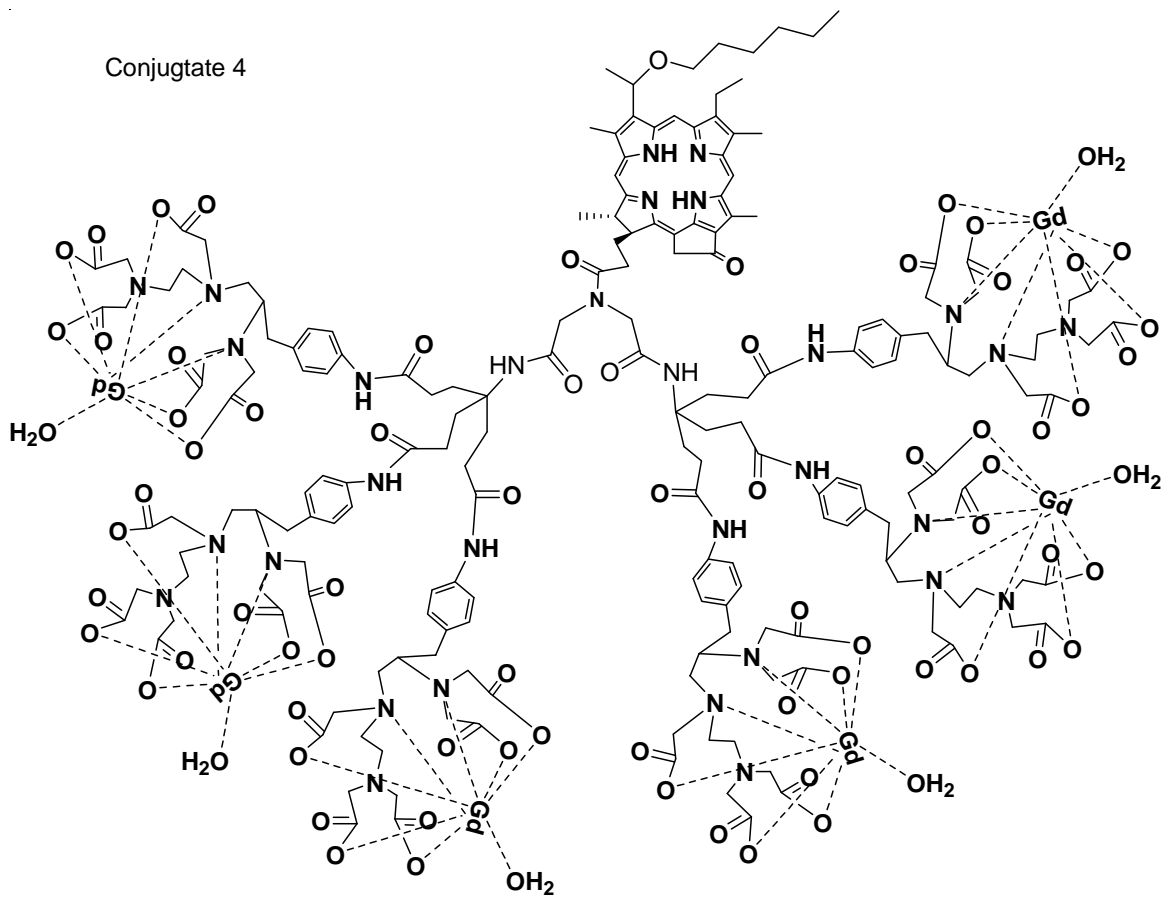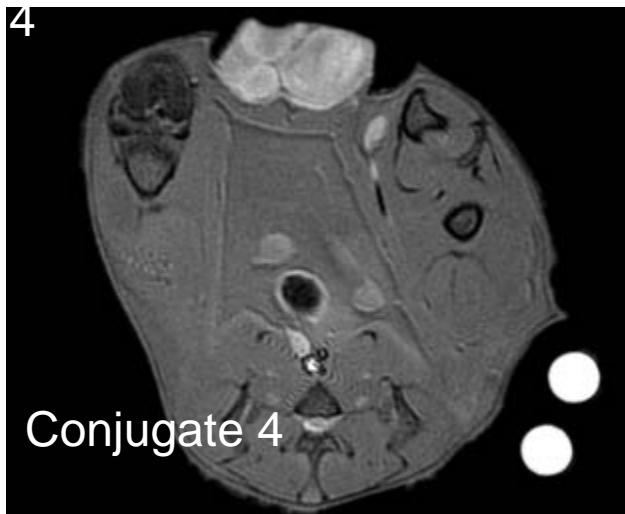

S4

Conjugat 5

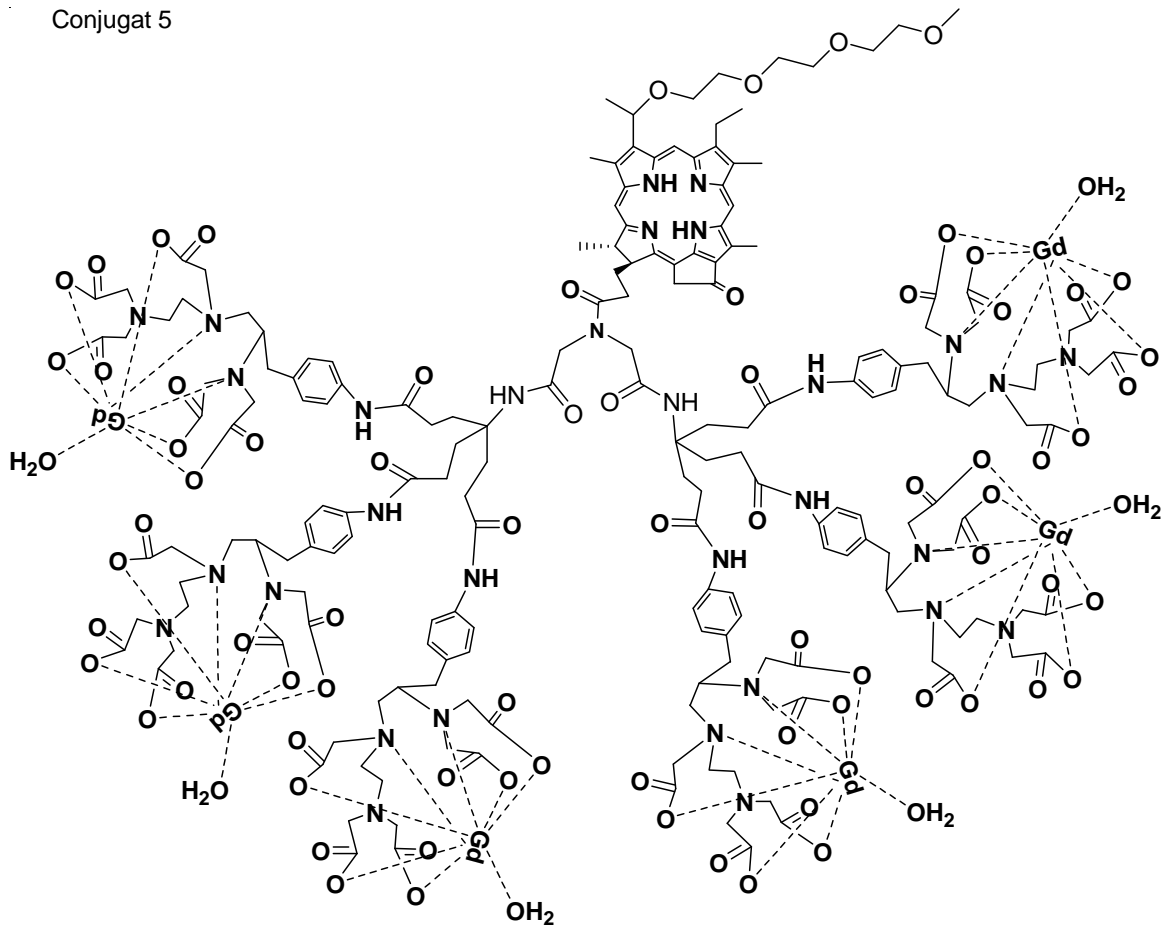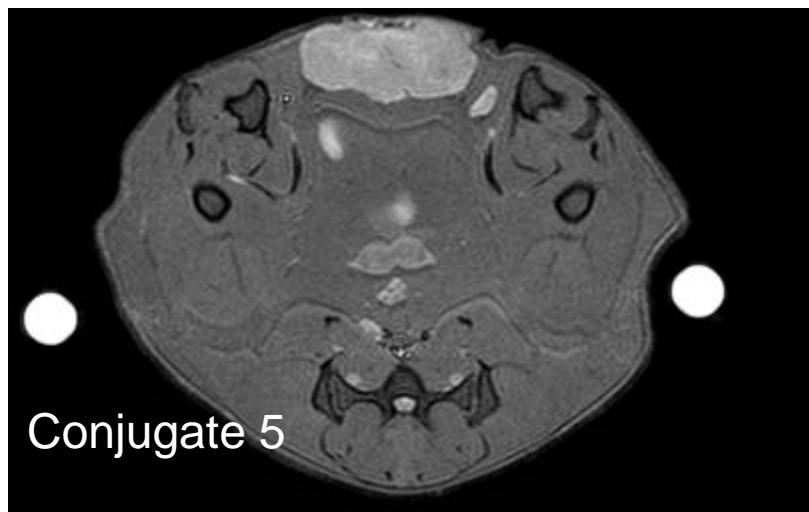

*In Vitro* Subcellular Localization Data

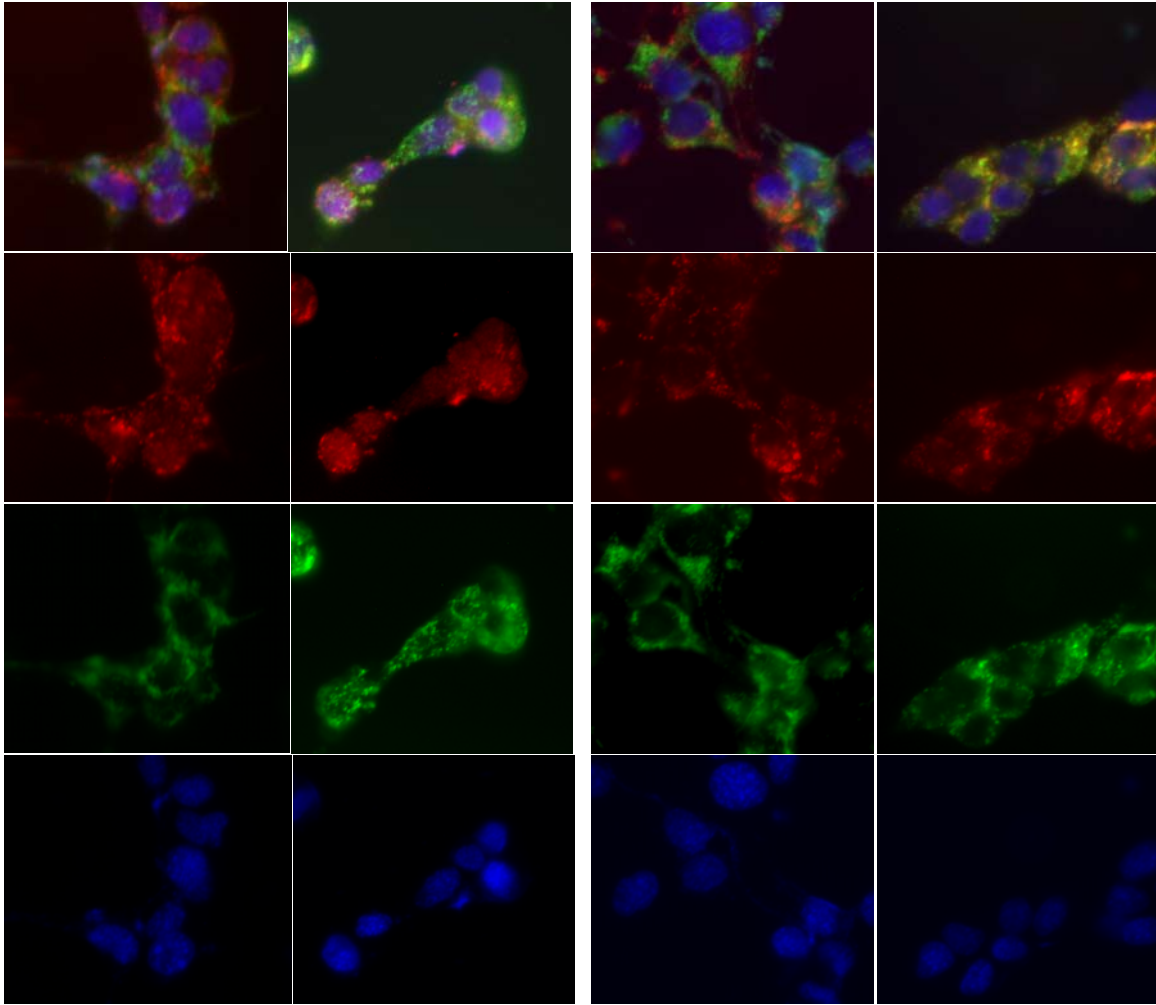

**Supplementary information** False-color images of conjugate **3** (red) in Colon26 cells after 4h (left columns) or 24 h (right columns) incubations. Top row: overlay of conjugate **3**, probe (green) and DAPI (blue). Areas of co-localization with organelle probes are indicated by yellow. Second row: conjugate **3**. Third row: probes, left MitoTracker Green; right, LysoTracker Green. Bottom Row: DAPI. Little co-localization observed with Mitotracker Green or Lysotracker Green after 4 h incubation, and a small amount after 24 h incubation.

Summary of Subcellular localization of conjugate **3**  
after 4 and 24 h incubation with Colon26 murine colon carcinoma *in vitro*

| Photosensitizer<br>Conjugate <b>3</b> | PS coincident<br>with<br>Mitochondria<br>Mitotracker<br>Green<br>(MTG)<br>Orange/Yellow | PS coincident<br>with<br>Lysosomes<br>Lysotracker<br>Green<br>(LTG)<br>Orange/Yellow | PS coincident<br>with<br>Golgi<br>Bodipy-<br>ceramide C5<br>(Bodipy-C5)<br>Orange/Yellow |
|---------------------------------------|-----------------------------------------------------------------------------------------|--------------------------------------------------------------------------------------|------------------------------------------------------------------------------------------|
| 4 h incubation                        | +                                                                                       | -                                                                                    | ++++                                                                                     |
| 24 h<br>incubation                    | +                                                                                       | ++                                                                                   | ++++                                                                                     |
| HPPH                                  |                                                                                         |                                                                                      |                                                                                          |
| 24 h<br>incubation                    | ++++                                                                                    |                                                                                      |                                                                                          |
